# Supplementary material for: Curcumin Supplementation (Meriva®) Modulates Inflammation, Lipid Peroxidation and Gut Microbiota Composition in Chronic Kidney Disease
Source: MDPI journal article supplement (doi:10.3390/nu14010231), 2022-01-05
Supplement: s1 [file s1]

# Curcumin Supplementation (Meriva®) Modulates Inflammation, Lipid Peroxidation and Gut Microbiota Composition in Chronic Kidney Disease

Francesca Pivari <sup>1,\*</sup>, Alessandra Mingione <sup>1,†</sup>, Giada Piazzini <sup>1</sup>, Camilla Ceccarani <sup>2</sup>, Emerenziana Ottaviano <sup>3</sup>, Caterina Brasacchio <sup>4</sup>, Michele Dei Cas <sup>5</sup>, Margherita Vischi <sup>6</sup>, Mario Gennaro Cozzolino <sup>4,6</sup>, Paolo Fogagnolo <sup>4,7</sup>, Antonella Riva <sup>8</sup>, Giovanna Petrangolini <sup>8</sup>, Luigi Barrea <sup>9</sup>, Laura Di Renzo <sup>10</sup>, Elisa Borghi <sup>3</sup>, Paola Signorelli <sup>1</sup>, Rita Paroni <sup>5</sup> and Laura Soldati <sup>4,\*</sup>

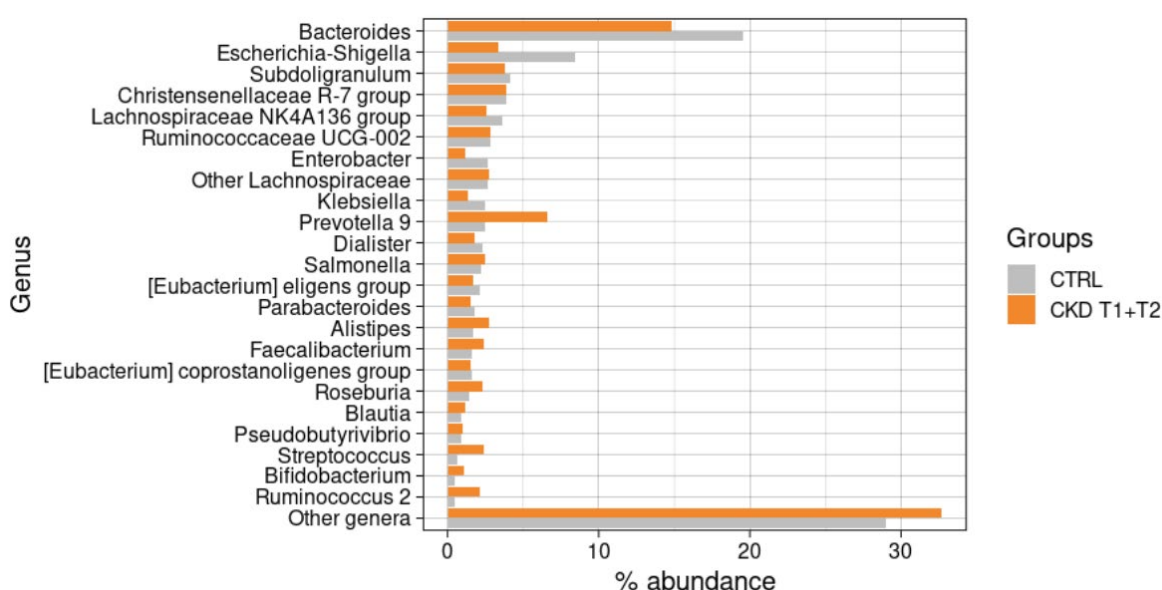

**Figure S1.** Taxonomic composition of the gut microbiota of healthy subjects and CKD at baseline.

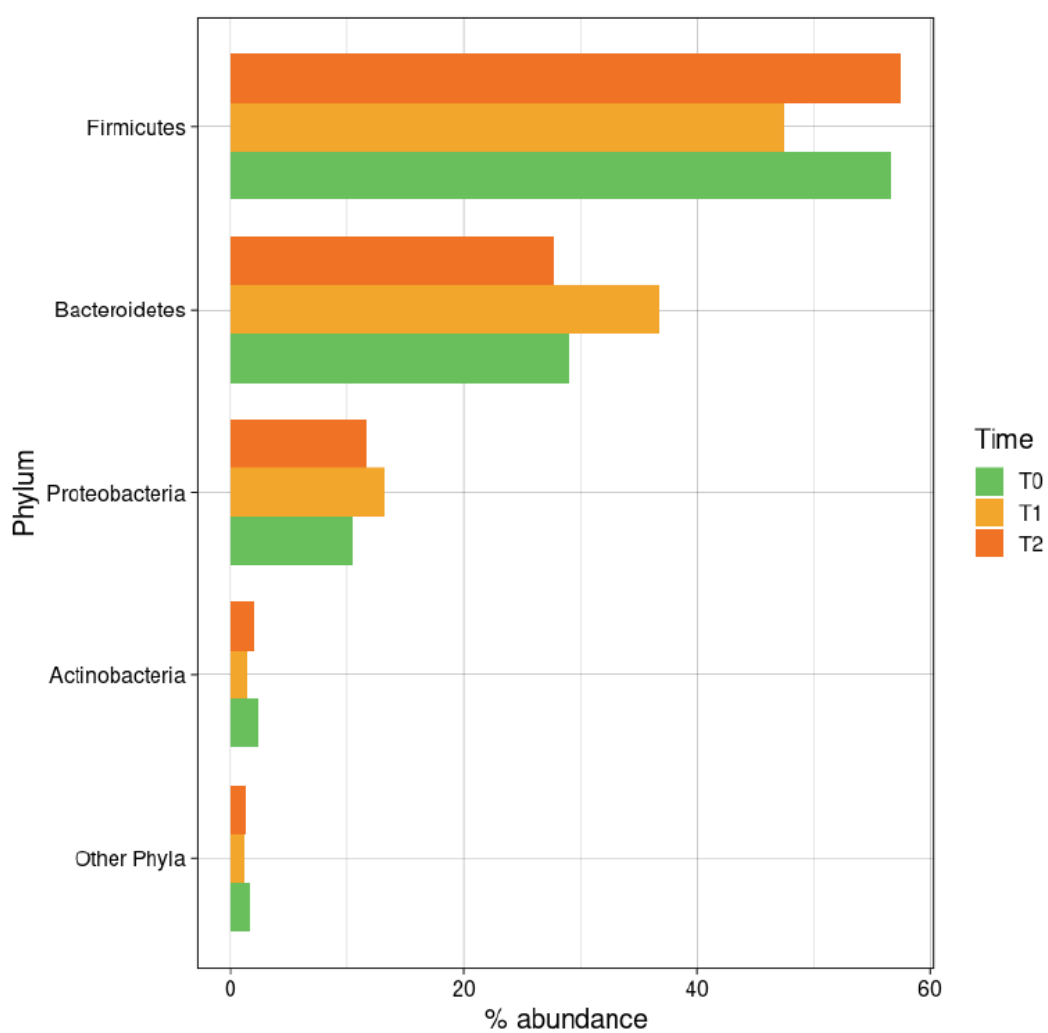

**Figure S2.** Taxonomic composition of the CKD gut microbiota at family level.

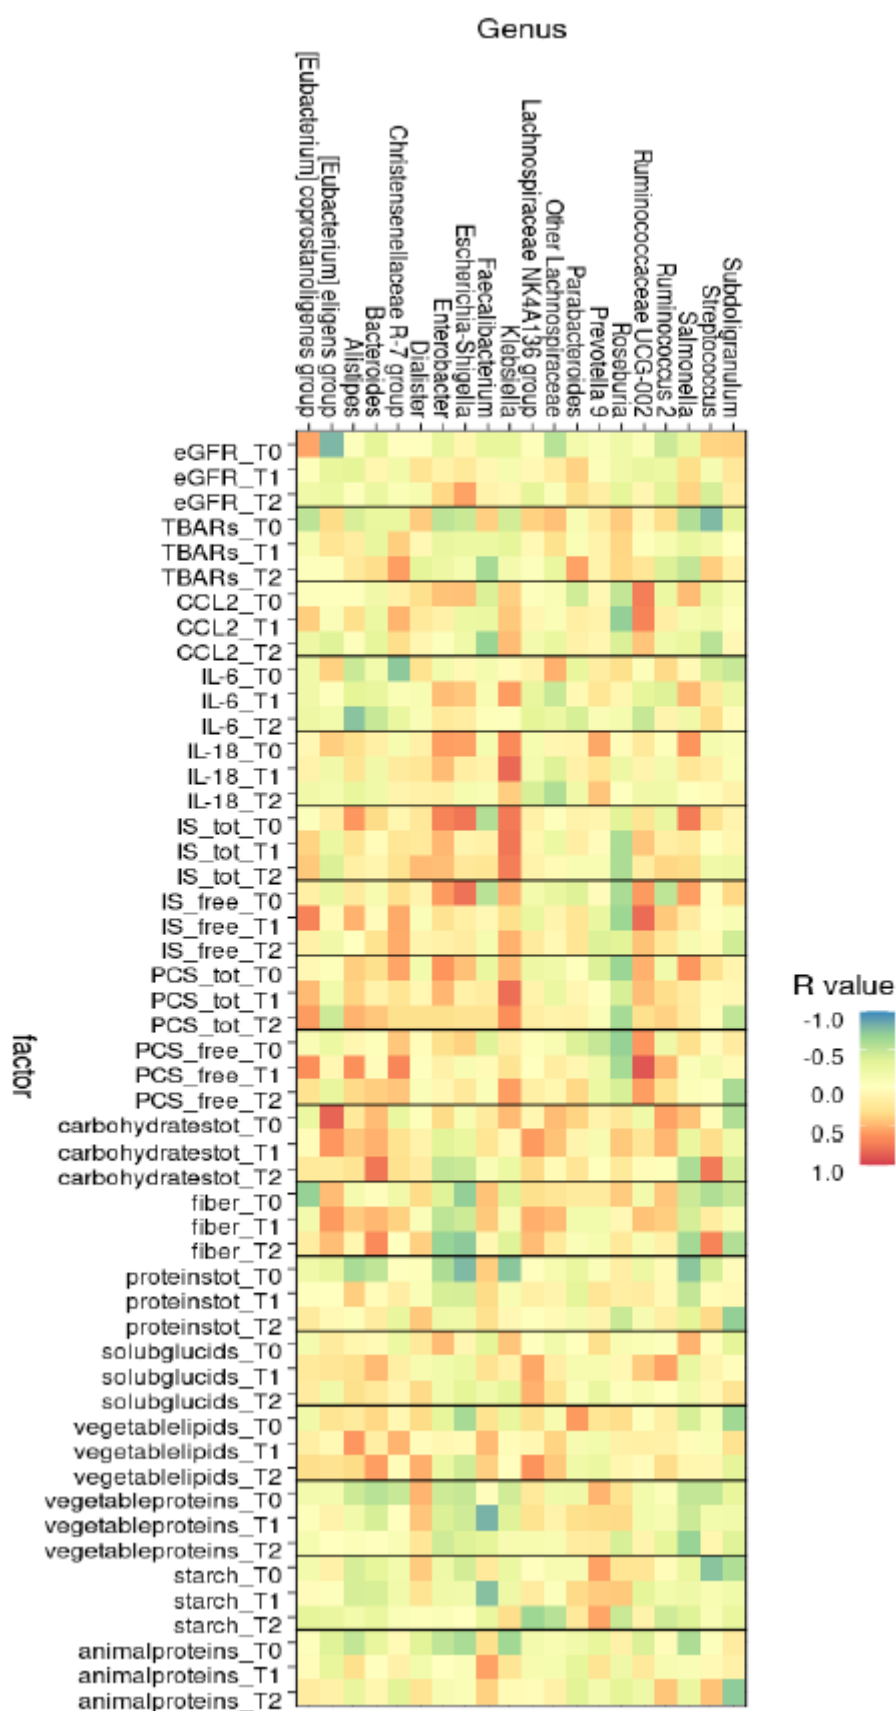

Figure S3. Co-abundant analysis of the main bacterial families and clinical parameters.
